# Supplementary material
Source: publisher figshare collection journal article supplement (https://acs.figshare.com/ndownloader/files/13534946)
Supplement: Supplementary file 1 [file 13534946]

# Supporting Information

## Multi-layer Ag-embedded Silica Nanostructure as SERS-based Chemical Sensor with Dual-Function Internal Standards

*Eunil Hahm, <sup>†, §</sup> Myeong Geun Cha, <sup>‡, §</sup> Eun Ji Kang, <sup>†</sup> Xuan-Hung Pham, <sup>†</sup> Sang Hun Lee, <sup>||</sup>*

*Hyung-Mo Kim, <sup>†</sup> Dong-Eun Kim, <sup>†</sup> Yoon-Sik Lee, <sup>⊥</sup> Dae-Hong Jeong<sup>‡</sup> and Bong-Hyun Jun<sup>†,\*</sup>*

<sup>†</sup> Department of Bioscience and Biotechnology, Konkuk University,  
Seoul 05029, Republic of Korea

<sup>‡</sup> Department of Chemistry Education, Seoul National University,  
Seoul 08826, Republic of Korea

<sup>||</sup> Department of Bioengineering, University of California Berkeley,  
CA 94720, USA

<sup>⊥</sup> School of Chemical and Biological Engineering, Seoul National University,  
Seoul 08826, Republic of Korea

\* Corresponding author: Bong-Hyun Jun: [bjun@konkuk.ac.kr](mailto:bjun@konkuk.ac.kr)

*§ These authors contributed equally to this work*

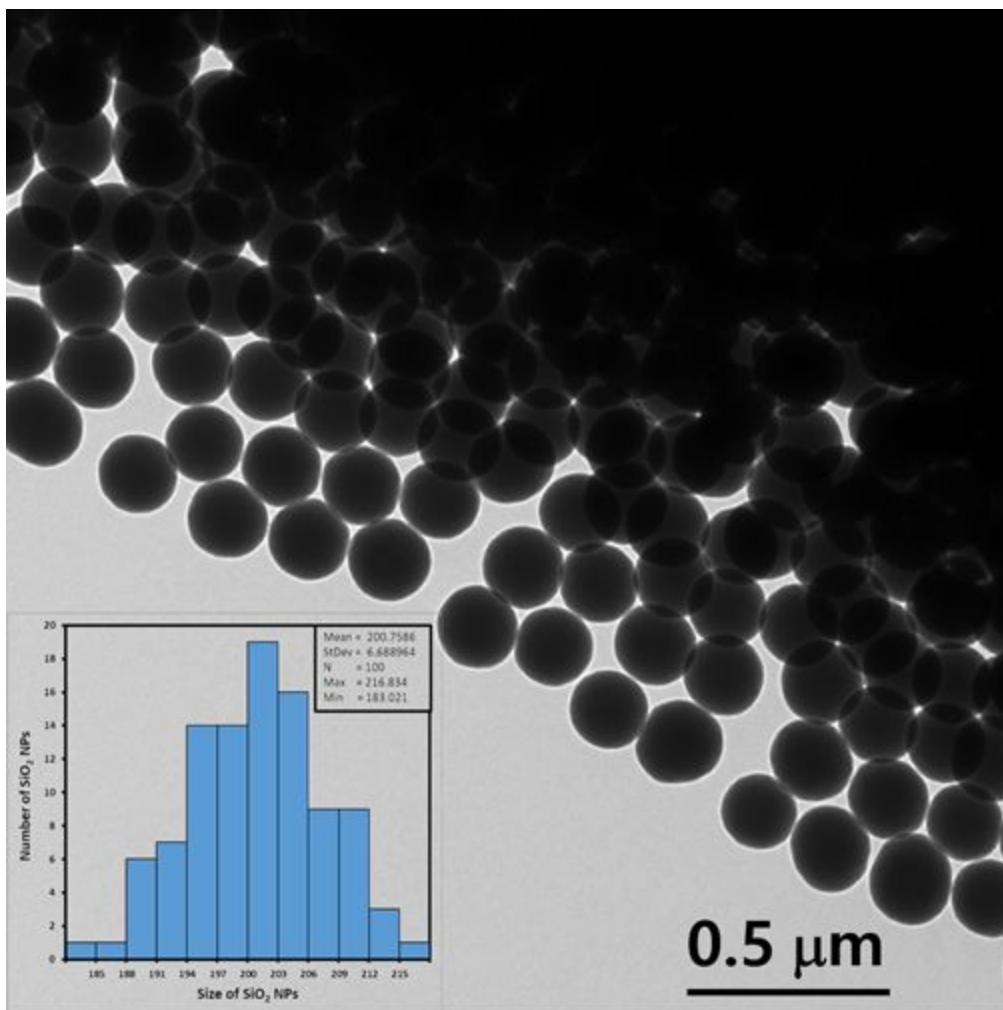

**Figure S1.** TEM image of SiO<sub>2</sub> NPs and histogram of size distribution.

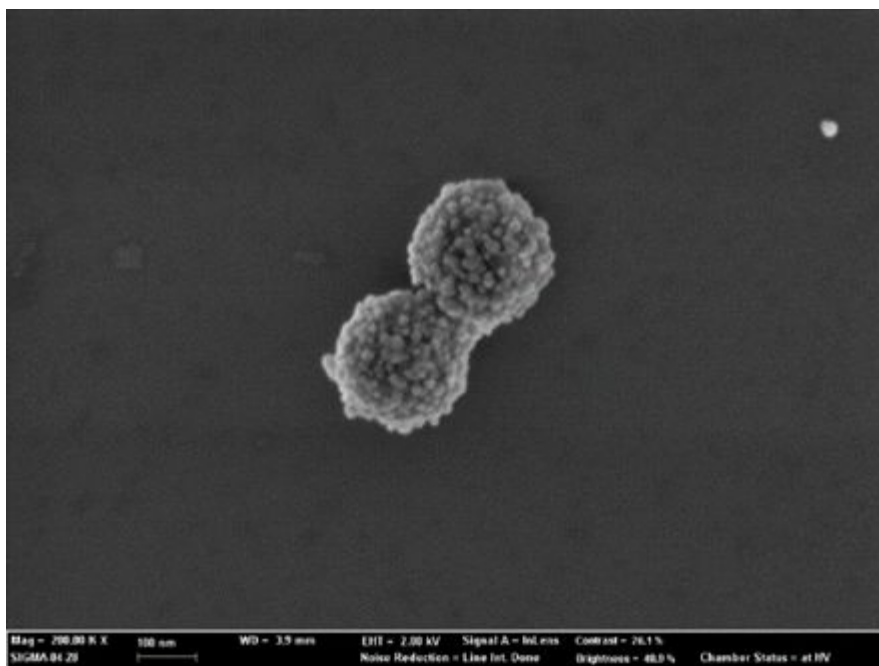

**Figure S2.** SEM image of ML<sub>4</sub>-BBT dot colloids.

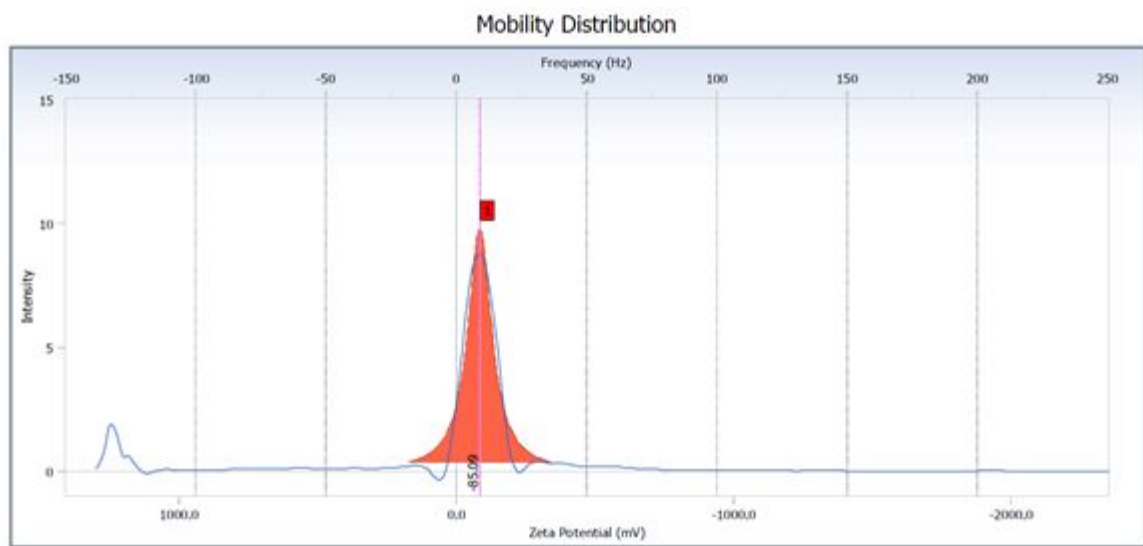

**Figure S3.** Zeta potential of ML<sub>4</sub>-BBT dot colloids.

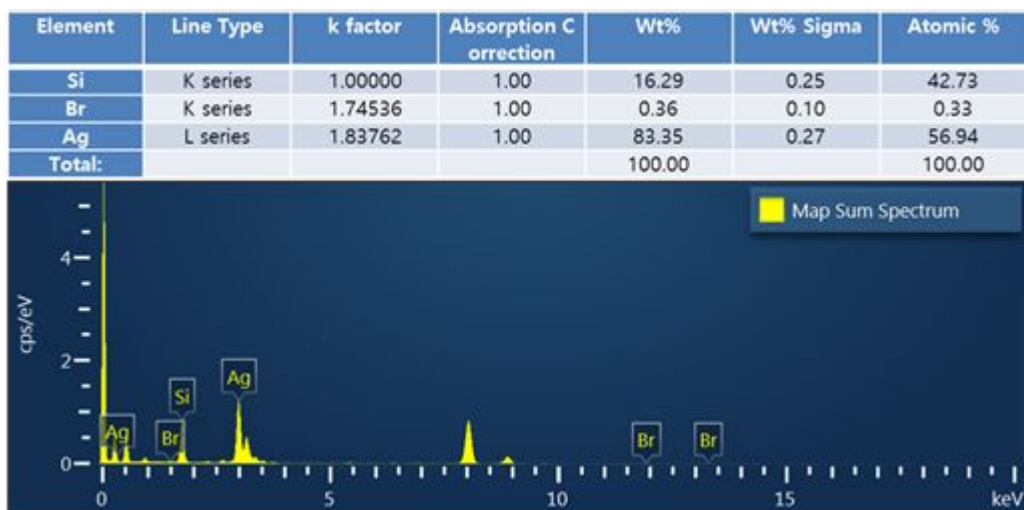

**Figure S4.** EDX analysis results of ML<sub>4</sub>-BBT dots.

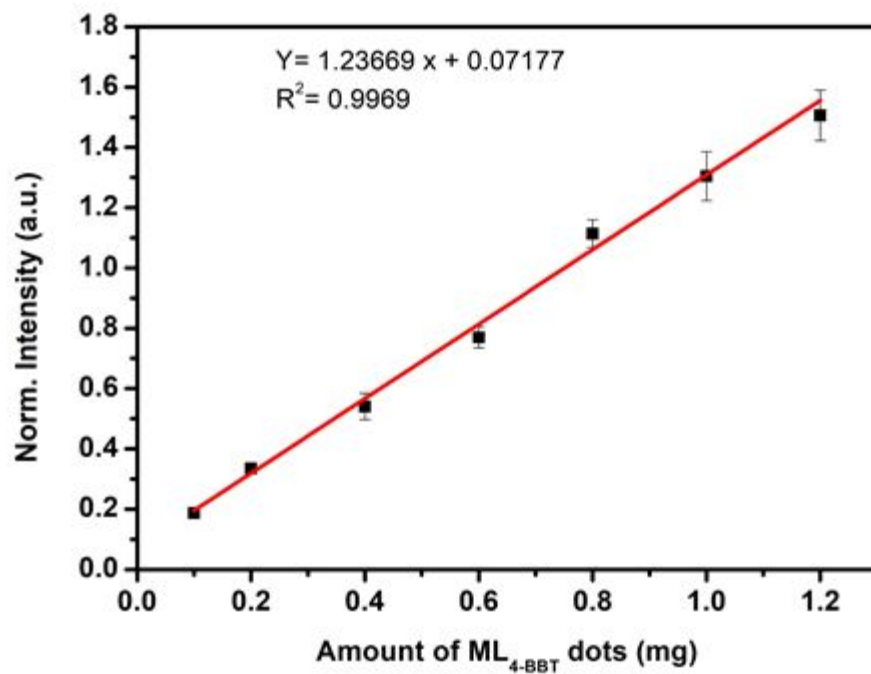

**Figure S5.** The internal standard SERS intensity according to amount of ML<sub>4-BBT</sub> dots

To prove that the ML dots solution can remain its well dispersion during the assay, we mixed the ML dots solution with analytes (4-FBT and thiram) and took pictures of the samples after 5 hours. As shown in Figure S6 (a), the ML dots mixed with analyte were still dispersed well. Also, the UV-Visible spectrum of ML dots solution mixed with analytes (4-FBT, several concentration) was very similar to UV-Visible spectrum of ML dots. Moreover, the z- potential of ML dots mixed with 4-FBT showed also high negative value (-73.75 mV), indicating that the ML dots remain its well dispersion during the assay. The UV-Vis spectrum and z-potential graph were shown below (Figure S6 (b) and (c)).

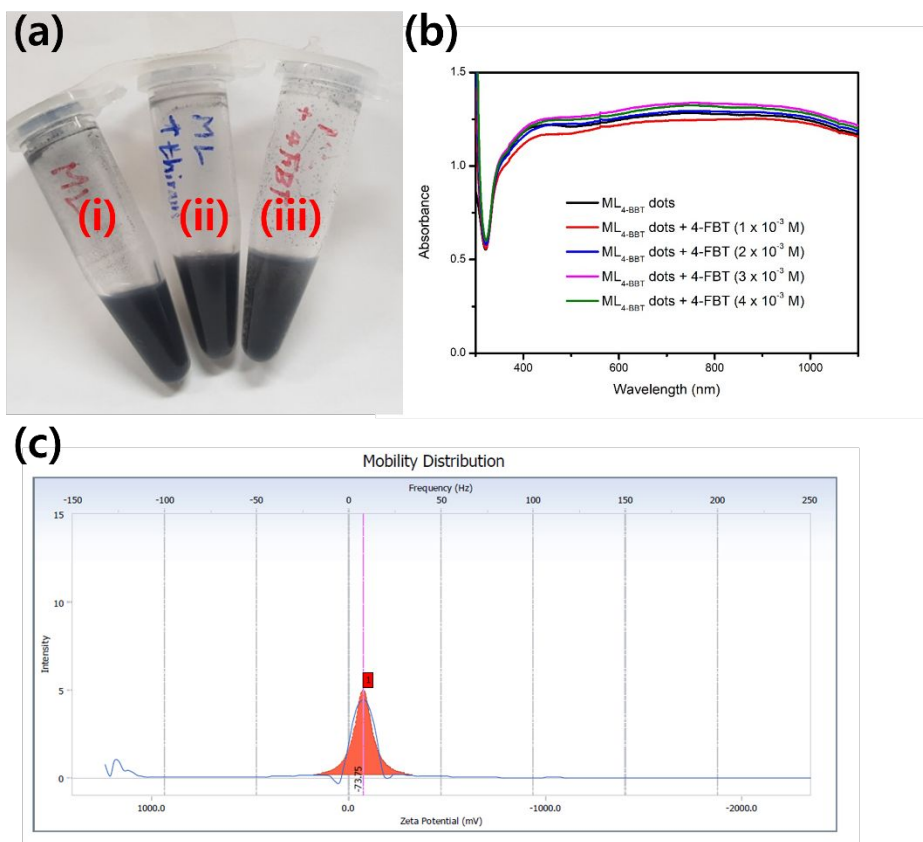

Figure S6. (a) The picture of ML<sub>4-BBT</sub> dots after 5 hours of mixing with analytes. (i) ML<sub>4-BBT</sub> dots, (ii) ML<sub>4-BBT</sub> dots mixed with thiram and (iii) ML<sub>4-BBT</sub> dots mixed with 4-FBT. (b) The UV-Vis spectrum of ML<sub>4-BBT</sub> dots mixed with several concentration of analytes. (c) The z-potential of ML<sub>4-BBT</sub> dots mixed with 4-FBT.
